# Supplementary material for: Electric Cell-Substrate Impedance Sensing To Monitor Viral Growth and Study Cellular Responses to Infection with Alphaherpesviruses in Real Time
Source: PubMed Central journal article supplement (PMC5381265; doi:10.1128/msphere.00039-17), 2017-04-05
Supplement: sph002172265sf3.pdf [file sph002172265sf3.pdf]

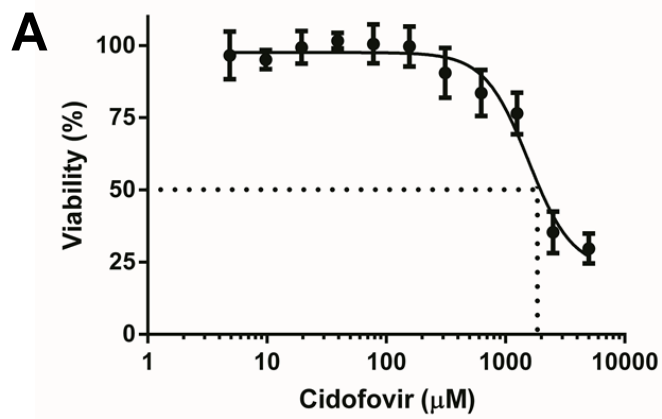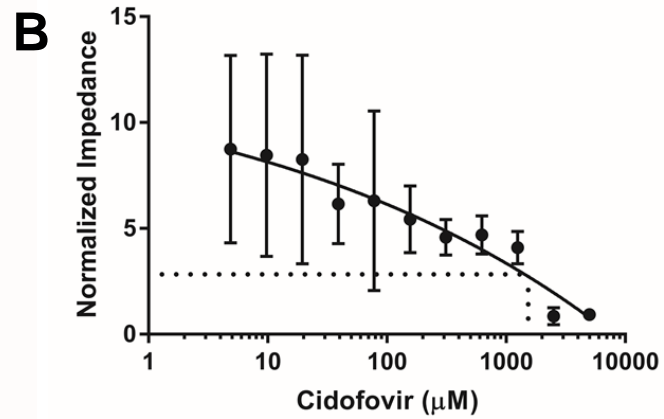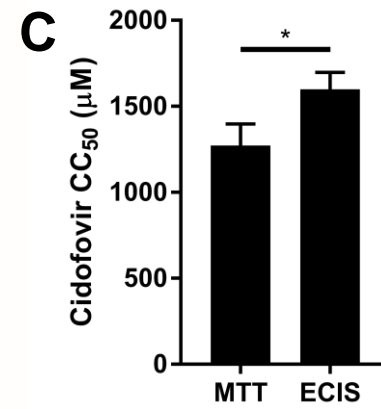

*Pennington and Van de Walle, Sup. Fig 3*
